# Supplementary material for: CG dinucleotides enhance promoter activity independent of DNA methylation
Source: Genome Res. 2019 Apr;29(4):554–63. doi: 10.1101/gr.241653.118 (PMC6442381; doi:10.1101/gr.241653.118)
Supplement: Supplemental Material [file supp_gr.241653.118_Supplemental_Table_S1.xlsx]

## Sheet: Sheet1
Name	Sequence
DH.P6	AATGATACGGCGACCACCGAGATCTACACTCTTTCCCTACACGACGCTCTTCCGATCT	BC amplification Primer
DH.P8	CAAGCAGAAGACGGCATACGAGATACATCGGTGACTGGAGTTCAGACGTGTGCTCTTCCGATCT	Indexing Primer NEB 2 Index
DH.P26	CAAGCAGAAGACGGCATACGAGATATTGGCGTGACTGGAGTTCAGACGTGTGCTCTTCCGATCT	Indexing Primer NEB 6 Index
DH.P27	CAAGCAGAAGACGGCATACGAGATTACAAGGTGACTGGAGTTCAGACGTGTGCTCTTCCGATCT	Indexing Primer NEB 12 Index
DH.P30	CAAGCAGAAGACGGCATACGAGATTGGTCAGTGACTGGAGTTCAGACGTGTGCTCTTCCGATCT	Indexing Primer NEB 4 Index
DH.P31	CAAGCAGAAGACGGCATACGAGATGATCTGGTGACTGGAGTTCAGACGTGTGCTCTTCCGATCT	Indexing Primer NEB 7 Index
DH.P32	CAAGCAGAAGACGGCATACGAGATGACTGTGTGACTGGAGTTCAGACGTGTGCTCTTCCGATCT	Indexing Primer NEB 5 Index
DH.P33	CAAGCAGAAGACGGCATACGAGATTCAAGTGTGACTGGAGTTCAGACGTGTGCTCTTCCGATCT	Indexing Primer NEB 8 Index
DH.P34	CAAGCAGAAGACGGCATACGAGATGTGATCGTGACTGGAGTTCAGACGTGTGCTCTTCCGATCT	Indexing Primer NEB 9 Index
DH.P39	AATGATACGGCGACCACCGAGATCTACACTCTTTCCCTACACGACGCTCTTCCGATCTTCCACTGGGAGAAGAGGAAGTCAAA	BC to Promoter amplification Primer
RSG353	TTTATTGGGAGAAGAGGAAGTTAAA	Primer for Methylation amplicon
RSG354	TCCAATTCACAACAACACAATAAATAT	Primer for Methylation amplicon
Supplemental Table 1: Primers used for the high throughput reporter assay and methylation profiling.
