# Supplementary material for: CG dinucleotides enhance promoter activity independent of DNA methylation
Source: Genome Res. 2019 Apr;29(4):554–63. doi: 10.1101/gr.241653.118 (PMC6442381; doi:10.1101/gr.241653.118)
Supplement: Supplemental Material [file supp_gr.241653.118_Supplemental_Table_S2.xlsx]

## Sheet: Sheet1
Library	Design	Comments	Barcode to promoter assignment	read length	number of nucleotides used for alignment/stringdistance	used for main Figures	Number of assayed constructs
HKG lib1	Library of HKG promoters and CMV promoter		alignment	2x250	read1: 150		10
HKG lib2	Library of HKG promoters that are bound by Sp1, Sp3, Gabpa and Nrf1		alignment	2x250	read1: 80		68
CpGdensity lib1	Library of DNA sequences from the E. coli genome with high CpG densities	mixed with HKG lib1 cells for reporter assay	alignment	2x300	read1: 20	Figure 1	17
HKGmut lib3	CpG mutants of HKG promoters		stringdistance	2x300		Figure 3	53
Snx3 lib1	Snx3 5 windows with CpGs mutated to TpGs in all possible combinations of windows	mixed with HKG lib1 WT cells for reporter assay in WT, and HKG lib1 DNA for TKO RMCE	stringdistance	2x300	read1: 251, read2: 233	Figure 3	34
Pwp2 lib3	pwp2 4 windows with CpGs mutated to ApGs in all possible combinations of windows, mutations of specific motifs within the promoter	mixed with HKG lib1 WT cells for reporter assay in WT, and HKG lib1 DNA for TKO RMCE	stringdistance	2x300	read1: 257 , read2: 229	Figure 3, 4	34
Pwp2 lib4	mutation of 42 tiling 10 bp windows in the pwp2 promoter		stringdistance	2x300	read1: 257 , read2: 229	Figure 4	45
Pwp2 lib5	mutation of CpGs within regions in the pwp2 promoter that themselves do not contribute to transcriptional activity, introduction of CpGs into an artificial promoter		stringdistance	2x300	read1: 257 , read2: 229	Figure 5	23
Supplemental Table 2: Overview on the expression assay libraries used for this study.
